# Supplementary material for: Harmful DNA:RNA hybrids are formed in cis and in a Rad51-independent manner
Source: eLife journal article supplement (doi:10.7554/elife.56674), 2020-08-04
Supplement: supp [file elife-56674-supp-v1.zip]

Archive with 9 entries (9 files):
- elife_poa_e56674_Figure_1_figure_supplement_1.ai
- elife_poa_e56674_Figure_1_figure_supplement_1_source_data_1.xlsx
- elife_poa_e56674_Figure_2_source_data_1.xlsx
- elife_poa_e56674_Figure_3_source_data_1.xlsx
- elife_poa_e56674_Figure_4_source_data_1.xlsx
- elife_poa_e56674_Figure_5_source_data_1.xlsx
- elife_poa_e56674_Figure_6_source_data_1.xlsx
- elife_poa_e56674_Figure_7_source_data_1.xlsx
- elife_poa_e56674_Transparent_Reporting_File.pdf
