# Supplementary material for: Harmful DNA:RNA hybrids are formed in cis and in a Rad51-independent manner
Source: eLife journal article supplement (doi:10.7554/elife.56674), 2020-08-04
Supplement: supp [file elife-56674-supp-v1.zip › elife_poa_e56674_Figure_1_figure_supplement_1_source_data_1.xlsx]

## Sheet: FigS1
Figure S1
															Statistics												WT				hpr1Δ				rnh1Δrnh201Δ
	Data (LacZ expression (R.U.))															GL-LacZ OFF		GL-LacZ ON		tet:LacZ OFF		tet:LacZ ON					GL-LacZ OFF	GL-LacZ ON	tet:LacZ OFF	tet:LacZ ON	GL-LacZ OFF	GL-LacZ ON	tet:LacZ OFF	tet:LacZ ON	GL-LacZ OFF	GL-LacZ ON	tet:LacZ OFF	tet:LacZ ON
		GL-LacZ OFF			GL-LacZ ON			tet:LacZ OFF			tet:LacZ ON					Average	SEM	Average	SEM	Average	SEM	Average	SEM		WT	GL-LacZ OFF		0.293368	0.0216556	0.0420266	0.00443291				0.0339553
	WT	1	1	1	797.069	66.4462	39.3511	5.70157	2.60044	5.0343	15.305	26.5238	8.24615		WT	1	0	300.955	248.18	4.44544	0.942395	16.6916	5.32167			GL-LacZ ON	0.293368		0.29819	0.225543		0.300847		0.305868		0.352512		0.626088
	hpr1Δ	1.87714	1.60571	2.12622	11.1442	3.67986	4.11108	10.5121	3.52089	2.02957	19.0883	6.50963	3.73962		hpr1Δ	1.86969	0.150304	6.31173	2.41946	5.35418	2.61463	9.77919	4.72275			tet:LacZ OFF	*	0.29819		0.385317
	rnh1Δrnh201Δ	1.67332	2.27988	3.16672	2856.89	806.179	19.3136	450.538	16.3733	9.56872	1280.52	104.133	226.948		rnh1Δrnh201Δ	2.37331	0.433631	1227.46	845.788	158.827	145.869	537.2	373.347			tet:LacZ ON	*	0.225543	0.385317			0.225543		0.23576		0.225543		0.23576
																									hpr1Δ	GL-LacZ OFF	**					0.14083	0.25414	0.16946
																						P-value	<=			GL-LacZ ON		0.300847		0.305868	0.14083		0.801378	0.549127
																						0.0001	****			tet:LacZ OFF					0.25414	0.801378		0.458409
																						0.001	***			tet:LacZ ON		0.225543		0.23576	0.16946	0.549127	0.458409
																						0.01	**		rnh1Δrnh201Δ	GL-LacZ OFF	*									0.221066	0.343869	0.225271
																						0.05	*			GL-LacZ ON		0.352512		0.626088					0.221066		0.281057	0.49679
																										tet:LacZ OFF									0.343869	0.281057		0.398634
																										tet:LacZ ON		0.225543		0.23576					0.225271	0.49679	0.398634
