# Supplementary material for: Harmful DNA:RNA hybrids are formed in cis and in a Rad51-independent manner
Source: eLife journal article supplement (doi:10.7554/elife.56674), 2020-08-04
Supplement: supp [file elife-56674-supp-v1.zip › elife_poa_e56674_Figure_2_source_data_1.xlsx]

## Sheet: Fig2A
Figure 2. Panel A
	Recombination sistem (CIS): GL-LacZ
	Ectopic RNA (TRANS): pCM179
																																	Statistics												WT				rnh1Δrnh201Δ
	Data (recombination frequency x10^4)																																	CIS- TRANS-		CIS- TRANS+		CIS+ TRANS-		CIS+ TRANS+					CIS- TRANS-	CIS- TRANS+	CIS+ TRANS-	CIS+ TRANS+	CIS- TRANS-
		CIS- TRANS-								CIS- TRANS+							CIS+ TRANS-								CIS+ TRANS+									Average	SEM	Average	SEM	Average	SEM	Average	SEM		WT	CIS- TRANS-		0.867994	1.50885e-05	4.14827e-05	5.11847e-08
	WT	10.2814	8.74597	9.31443	5.7	4.24	5.11	4.3	4.81	10.8176	10.082	6.75921	3.31	4.1	5.4	3.78	21.375	20.5357	19.0414	23.2	24.8	11.09	15.31		31.3636	32.9902	30.8626	17.2	18.2	18.57	16.53		WT	6.56272	0.872278	6.32126	1.15326	19.336	1.79068	23.6738	2.87254			CIS- TRANS+	0.867994			0.000115053
	rnh1Δrnh201Δ	38.7175	37.5439	46.0579						35.5136	29.8856	35.6191					216.296	155.694	147.92	253	562	302			308.271	259.288	388	105	370				rnh1Δrnh201Δ	40.7731	2.66405	33.6728	1.89381	272.818	62.5521	286.112	50.7102			CIS+ TRANS-	****			0.137174
	mft1Δ	33.4634	43.7912	31.384	50.3	43.9	80.43	45.62	66.36	70.8333	41.0526	57.6577	95	69.41	70.45		4022.53	2530	2484.39	1920	1550	4121.94	6198.37	3219.43	923.301	284.512	493.055	394	383	335.42	475		mft1Δ	49.4061	5.8338	67.4006	7.24796	3255.83	531.408	469.755	80.4601			CIS+ TRANS+	****	***	0.137174
	hpr1Δ	100	106.98	142.32	145.45					159	215.84	160.5	118.08				3658.33	3999.71	4707.4						727	1863.64	1254.31	1338.38					hpr1Δ	123.688	11.7651	163.355	20.0658	4121.81	308.933	1295.83	232.65		rnh1Δrnh201Δ	CIS- TRANS-	****
																																												CIS- TRANS+					0.0955642
																																								P-value	<=			CIS+ TRANS-					*
																																								0.0001	****			CIS+ TRANS+					*
																																								0.001	***		mft1Δ	CIS- TRANS-	****
																																								0.01	**			CIS- TRANS+
																																								0.05	*			CIS+ TRANS-
																																												CIS+ TRANS+
																																											hpr1Δ	CIS- TRANS-	****
																																												CIS- TRANS+
																																												CIS+ TRANS-
																																												CIS+ TRANS+
[truncated: 11 more columns]

## Sheet: Fig2B
Figure 2. Panel B
	Recombination sistem (CIS): GL-LacZi
	Ectopic RNA (TRANS): pCM179
															Statistics												WT				mft1Δ				hpr1Δ
	Data (recombination frequency x10^4)															CIS- TRANS-		CIS- TRANS+		CIS+ TRANS-		CIS+ TRANS+					CIS- TRANS-	CIS- TRANS+	CIS+ TRANS-	CIS+ TRANS+	CIS- TRANS-	CIS- TRANS+	CIS+ TRANS-	CIS+ TRANS+	CIS- TRANS-	CIS- TRANS+	CIS+ TRANS-	CIS+ TRANS+
		CIS- TRANS-			CIS- TRANS+			CIS+ TRANS-			CIS+ TRANS+					Average	SEM	Average	SEM	Average	SEM	Average	SEM		WT	CIS- TRANS-		0.571776	0.00179158	0.0222974	0.000148922				0.00521914
	WT	6.5	7.13	7.05	6.21	7.45	6.16	13.75	17.07	13.98	13.47	11.49	18.5		WT	6.89333	0.198018	6.60667	0.421914	14.9333	1.07039	14.4867	2.08648			CIS- TRANS+	0.571776			0.0208033
	mft1Δ	80.29	70.74	88.72	31.97	42.3	36.8	4962.73	3793.65	5216.67	419.23	369.32	396.72		mft1Δ	79.9167	5.19373	37.0233	2.9841	4657.68	438.192	395.09	14.4308			CIS+ TRANS-	**			0.858214
	hpr1Δ	162.12	89.18	120.14	62.65	60.19	52.73	5521.84	4949.78	4583.97	579.17	154.35	595.4		hpr1Δ	123.813	21.1359	58.5233	2.98244	5018.53	272.913	442.973	144.388			CIS+ TRANS+	*	*	0.858214
																									mft1Δ	CIS- TRANS-	***					0.00201297	0.000474503	3.31198e-05
																						P-value	<=			CIS- TRANS+					**			1.70192e-05
																						0.0001	****			CIS+ TRANS-					***			0.000626656
																						0.001	***			CIS+ TRANS+					****	****	***
																						0.01	**		hpr1Δ	CIS- TRANS-	**									0.0377044	5.74821e-05	0.0939929
																						0.05	*			CIS- TRANS+									*			0.0562697
																										CIS+ TRANS-									****			0.000120715
																										CIS+ TRANS+									0.0939929	0.0562697	***

## Sheet: Fig2C
Figure 2. Panel C
	Recombination sistem (CIS): GL-LacZ
	Ectopic RNA (TRANS): LacZ 400
															Statistics												WT				rnh1Δrnh201Δ				mft1Δ
	Data (recombination frequency x10^4)															CIS- TRANS-		CIS- TRANS+		CIS+ TRANS-		CIS+ TRANS+					CIS- TRANS-	CIS- TRANS+	CIS+ TRANS-	CIS+ TRANS+	CIS- TRANS-	CIS- TRANS+	CIS+ TRANS-	CIS+ TRANS+	CIS- TRANS-	CIS- TRANS+	CIS+ TRANS-	CIS+ TRANS+
		CIS- TRANS-			CIS- TRANS+			CIS+ TRANS-			CIS+ TRANS+					Average	SEM	Average	SEM	Average	SEM	Average	SEM		WT	CIS- TRANS-		0.258064	0.00292999	0.0147853	0.00506197				0.004545
	WT	13.2909	9.11458	9.85401	12.4742	12.5123	12.3618	26.875	37.5926	33.1765	26.095	18.8103	19.7222		WT	10.7532	1.2867	12.4495	0.0451829	32.548	3.10982	21.5425	2.29141			CIS- TRANS+	0.258064			0.0165727
	rnh1Δrnh201Δ	35.8571	34.553	50.5971	23.4254	26.6061	30.8752	277.812	90.6429	123.771	119.697	166.099	149.521		rnh1Δrnh201Δ	40.3357	5.14444	26.9689	2.15819	164.075	57.667	145.106	13.5758			CIS+ TRANS-	**			0.046439
	mft1Δ	45.3595	32.3302	50.5342	36.0204	27.581	34.3152	3243.89	2280.78	2745.09	2358.04	2014.61	2572.37		mft1Δ	42.7413	5.41563	32.6389	2.57641	2756.59	278.084	2315.01	162.444			CIS+ TRANS+	*	*	*
																									rnh1Δrnh201Δ	CIS- TRANS-	**					0.074679	0.0993916	0.00195509
																						P-value	<=			CIS- TRANS+					0.074679			0.00100724
																						0.0001	****			CIS+ TRANS-					0.0993916			0.764844
																						0.001	***			CIS+ TRANS+					**	**	0.764844
																						0.01	**		mft1Δ	CIS- TRANS-	**									0.167365	0.000618053	0.000151855
																						0.05	*			CIS- TRANS+									0.167365			0.000148976
																										CIS+ TRANS-									***			0.242224
																										CIS+ TRANS+									***	***	0.242224
