# Supplementary material for: Harmful DNA:RNA hybrids are formed in cis and in a Rad51-independent manner
Source: eLife journal article supplement (doi:10.7554/elife.56674), 2020-08-04
Supplement: supp [file elife-56674-supp-v1.zip › elife_poa_e56674_Figure_3_source_data_1.xlsx]

## Sheet: Fig3
Figure 3
	GL-LacZ														Statistics												WT				hpr1Δ				rnh1Δrnh201Δ					P-value	<=
	Data (S9.6 signal (% IP))															OFF		OFF + RNH		ON		ON + RNH					OFF	OFF + RNH	ON	ON + RNH	OFF	OFF + RNH	ON	ON + RNH	OFF	OFF + RNH	ON	ON + RNH		0.0001	****
		OFF			OFF + RNH			ON			ON + RNH					Average	SEM	Average	SEM	Average	SEM	Average	SEM		WT	OFF		0.0122974	0.290597		0.0217766				0.189791					0.001	***
	WT	0.0647	0.0365	0.0613	0.0118	0.0146	0.0181	0.0587	0.0623	0.0903	0.0135	0.0095	0.0142		WT	0.0541667	0.00888769	0.0148333	0.00182239	0.0704333	0.00998755	0.0124	0.00146401			OFF + RNH	*													0.01	**
	hpr1Δ	0.0831	0.107	0.1144	0.0202	0.011	0.0151	0.1293	0.1393	0.1787	0.0071	0.0229	0.0221		hpr1Δ	0.1015	0.00944475	0.0154333	0.00266104	0.1491	0.0150789	0.0173667	0.00513853			ON	0.290597			0.00453791										0.05	*
	rnh1Δrnh201Δ	0.0609	0.0705	0.0826	0.0114	0.0422	0.0826	0.1118	0.1175	0.1478	0.0057	0.0216	0.0149		rnh1Δrnh201Δ	0.0713333	0.00627809	0.0454	0.0206159	0.1257	0.0111718	0.0140667	0.00460881			ON + RNH			**
																									hpr1Δ	OFF	*					0.000931529	0.0555009
																										OFF + RNH					***
																										ON					0.0555009			0.00116702
																										ON + RNH							**
																									rnh1Δrnh201Δ	OFF	0.189791									0.295182	0.0132379
																										OFF + RNH									0.295182
																										ON									*			0.000763472
																										ON + RNH											***
	GL-LacZi														Statistics												WT				hpr1Δ				rnh1Δrnh201Δ
	Data (S9.6 signal (% IP))															OFF		OFF + RNH		ON		ON + RNH					OFF	OFF + RNH	ON	ON + RNH	OFF	OFF + RNH	ON	ON + RNH	OFF	OFF + RNH	ON	ON + RNH
		OFF			OFF + RNH			ON			ON + RNH					Average	SEM	Average	SEM	Average	SEM	Average	SEM		WT	OFF		0.0934878	0.749179		0.047539				0.090043
	WT	0.0459	0.1113	0.0673	0.0374	0.0198	0.0355	0.0537	0.1282	0.0729	0.0311	0.0265	0.0492		WT	0.0748333	0.0192514	0.0309	0.00557704	0.0849333	0.0223321	0.0356	0.00692844			OFF + RNH	0.0934878
	hpr1Δ	0.1587	0.115	0.1781	0.0329	0.0422	0.0845	0.4325	0.2059	0.2488	0.0852	0.0537	0.1445		hpr1Δ	0.1506	0.0186602	0.0532	0.0158786	0.295733	0.0694957	0.0944667	0.0266181			ON	0.749179			0.102505
	rnh1Δrnh201Δ	0.111	0.1491	0.1158	0.05	0.0571	0.0358	0.1779	0.21	0.2332	0.1041	0.0541	0.0476		rnh1Δrnh201Δ	0.1253	0.0119804	0.0476333	0.00626161	0.207033	0.0160325	0.0686	0.0178489			ON + RNH			0.102505
																									hpr1Δ	OFF	*					0.0164665	0.113895
																										OFF + RNH					*
																										ON					0.113895			0.0538422
																										ON + RNH							0.0538422
																									rnh1Δrnh201Δ	OFF	0.090043									0.00454863	0.015052
																										OFF + RNH									**
																										ON									*			0.00447864
																										ON + RNH											**
	pCM179														Statistics												WT				hpr1Δ				rnh1Δrnh201Δ
	Data (S9.6 signal (% IP))															OFF		OFF + RNH		ON		ON + RNH					OFF	OFF + RNH	ON	ON + RNH	OFF	OFF + RNH	ON	ON + RNH	OFF	OFF + RNH	ON	ON + RNH
		OFF			OFF + RNH			ON			ON + RNH					Average	SEM	Average	SEM	Average	SEM	Average	SEM		WT	OFF		0.00461993	0.851383		0.0288098				0.488137
	WT	0.0971	0.1509	0.1022	0.0133	0.0228	0.0158	0.099	0.1368	0.1018	0.0177	0.0299	0.0207		WT	0.116733	0.0171467	0.0173	0.00284312	0.112533	0.0121602	0.0227667	0.0036703			OFF + RNH	**
	hpr1Δ	0.1282	0.1797	0.1618	0.0757	0.0334	0.086	0.2503	0.54	0.2487	0.0607	0.1022	0.1086		hpr1Δ	0.156567	0.0150953	0.0650333	0.0160937	0.346333	0.0968344	0.0905	0.0150141			ON	0.851383			0.051539
	rnh1Δrnh201Δ	0.0681	0.1448	0.0814	0.0134	0.0282	0.0516	0.2279	0.232	0.162	0.1867	0.0688	0.1236		rnh1Δrnh201Δ	0.0981	0.0236635	0.0310667	0.0111202	0.2073	0.0226809	0.126367	0.0340629			ON + RNH			0.051539
																									hpr1Δ	OFF	*					0.0142799	0.124905
																										OFF + RNH					*
																										ON					0.124905			0.0593719
																										ON + RNH							0.0593719
																									rnh1Δrnh201Δ	OFF	0.488137									0.062387	0.0290645
																										OFF + RNH									0.062387
																										ON									*			0.119116
																										ON + RNH											0.119116
