# Supplementary material for: Harmful DNA:RNA hybrids are formed in cis and in a Rad51-independent manner
Source: eLife journal article supplement (doi:10.7554/elife.56674), 2020-08-04
Supplement: supp [file elife-56674-supp-v1.zip › elife_poa_e56674_Figure_4_source_data_1.xlsx]

## Sheet: Fig4
Figure 4
	Recombination sistem (CIS): TL-LacZ
	Ectopic RNA (TRANS): pRS416-GAL:LacZ
																							Statistics												WT				hpr1Δ				rnh1Δrnh201Δ
	Data (recombination frequency x10^4)																							CIS- TRANS-		CIS- TRANS+		CIS+ TRANS-		CIS+ TRANS+					CIS- TRANS-	CIS- TRANS+	CIS+ TRANS-	CIS+ TRANS+	CIS- TRANS-	CIS- TRANS+	CIS+ TRANS-	CIS+ TRANS+	CIS- TRANS-	CIS- TRANS+	CIS+ TRANS-	CIS+ TRANS+
		CIS- TRANS-					CIS- TRANS+					CIS+ TRANS-					CIS+ TRANS+							Average	SEM	Average	SEM	Average	SEM	Average	SEM		WT	CIS- TRANS-		0.166398	0.00166426	0.00323021	9.73323e-06				7.5273e-06
	WT	5.1	7.5	5.01	5.5	6.09	2.06	8.3	3.12	3.2	3.5	36.8	35.5	10.7	35.3	44.8	10.4	47.8	31.6	37.1	29.3		WT	5.84	0.456629	4.036	1.09342	32.62	5.75234	31.24	6.11053			CIS- TRANS+	0.166398			0.00234132
	hpr1Δ	12.1	14.6	13.65	11.5	12.6	12.04	45.6	47.4	14.9	23.9	141	549	313	439	419	301	410	269				hpr1Δ	12.89	0.554166	28.768	7.50437	372.2	68.8726	326.667	42.6784			CIS+ TRANS-	**			0.873464
	rnh1Δrnh201Δ	22.5	23.6	19.3			19.81	12.44	40.1			152	183	116			132	189	103				rnh1Δrnh201Δ	21.8	1.2897	24.1167	8.27001	150.333	19.3592	141.333	25.2609			CIS+ TRANS+	**	**	0.873464
																																	hpr1Δ	CIS- TRANS-	****					0.0678641	0.00080567	5.58348e-05
																														P-value	<=			CIS- TRANS+					0.0678641			9.8884e-05
																														0.0001	****			CIS+ TRANS-					***			0.655265
																														0.001	***			CIS+ TRANS+					****	****	0.655265
																														0.01	**		rnh1Δrnh201Δ	CIS- TRANS-	****									0.795661	0.00269296	0.00913234
																														0.05	*			CIS- TRANS+									0.795661			0.0116012
																																		CIS+ TRANS-									**			0.79137
																																		CIS+ TRANS+									**	*	0.79137
