# Supplementary material for: Harmful DNA:RNA hybrids are formed in cis and in a Rad51-independent manner
Source: eLife journal article supplement (doi:10.7554/elife.56674), 2020-08-04
Supplement: supp [file elife-56674-supp-v1.zip › elife_poa_e56674_Figure_5_source_data_1.xlsx]

## Sheet: Fig5
Figure 5
	Recombination sistem (CIS): chromosomal GL-LacZ
	Ectopic RNA (TRANS): pCM179
																					Statistics												WT				hpr1Δ
	Data (recombination frequency x10^4)																					CIS- TRANS-		CIS- TRANS+		CIS+ TRANS-		CIS+ TRANS+					CIS- TRANS-	CIS- TRANS+	CIS+ TRANS-	CIS+ TRANS+	CIS- TRANS-	CIS- TRANS+	CIS+ TRANS-	CIS+ TRANS+
		CIS- TRANS-						CIS- TRANS+						CIS+ TRANS-			CIS+ TRANS+					Average	SEM	Average	SEM	Average	SEM	Average	SEM		WT	CIS- TRANS-		0.690537	1.28387e-05	0.000413008	0.00859328
	WT	5	3.3	1.3	2.5	1.9	2.4	6.7	3.6	1.7	1.8	2		32.3	45.2	51.1	27.7	42.4	20.1		WT	2.73333	0.52831	3.16	0.950053	42.8667	5.55108	30.0667	6.54531			CIS- TRANS+	0.690537			0.00160061
	hpr1Δ	5.3	5.8	7.9	3.1	4.9	5.5	4.1	7.5	4	3.7	9	3.8	1296	1617	1089	1270	1164	1437		hpr1Δ	5.41667	0.63162	5.35	0.93906	1334	153.6	1290.33	79.4614			CIS+ TRANS-	****			0.210113
																																CIS+ TRANS+	***	**	0.210113
																												P-value	<=		hpr1Δ	CIS- TRANS-	**					0.954186	3.32551e-06	4.54867e-08
																												0.0001	****			CIS- TRANS+					0.954186			4.55306e-08
																												0.001	***			CIS+ TRANS-					****			0.813098
																												0.01	**			CIS+ TRANS+					****	****	0.813098
																												0.05	*
