# Supplementary material for: Harmful DNA:RNA hybrids are formed in cis and in a Rad51-independent manner
Source: eLife journal article supplement (doi:10.7554/elife.56674), 2020-08-04
Supplement: supp [file elife-56674-supp-v1.zip › elife_poa_e56674_Figure_6_source_data_1.xlsx]

## Sheet: Fig6
Figure 6
	Recombination sistem (CIS): GL-LacZ
	Ectopic RNA (TRANS): pCM179
																					Statistics												WT				hpr1Δ				rad51Δ				hpr1Δrad51Δ
	Data (recombination frequency x10^4)																					CIS- TRANS-		CIS- TRANS+		CIS+ TRANS-		CIS+ TRANS+					CIS- TRANS-	CIS- TRANS+	CIS+ TRANS-	CIS+ TRANS+	CIS- TRANS-	CIS- TRANS+	CIS+ TRANS-	CIS+ TRANS+	CIS- TRANS-	CIS- TRANS+	CIS+ TRANS-	CIS+ TRANS+	CIS- TRANS-	CIS- TRANS+	CIS+ TRANS-	CIS+ TRANS+
		CIS- TRANS-							CIS- TRANS+					CIS+ TRANS-			CIS+ TRANS+					Average	SEM	Average	SEM	Average	SEM	Average	SEM		WT	CIS- TRANS-		0.210531	0.00889703	0.000265003	0.00349183				0.0363572				0.000370675
	WT	3.4	2.6	3.2					4.7	4.8	2.8			23.8	18.9	35.1	28.2	31.6	36.4		WT	3.06667	0.24037	4.1	0.650641	25.9333	4.79664	32.0667	2.37861			CIS- TRANS+	0.210531			0.000344645
	hpr1Δ	60.4	54.3	35.2					34.8	61.8	60.2			2540	1172	3978	3030	1667	1016		hpr1Δ	49.9667	7.59042	52.2667	8.74554	2563.33	810.106	1904.33	593.379			CIS+ TRANS-	**			0.315858
	rad51Δ	5.6	3.9	5.9					6	8.6	6.5			30.9	41.5	37.7	40.1	41.7	30.75		rad51Δ	5.13333	0.622718	7.03333	0.79652	36.7	3.10054	37.5167	3.41471			CIS+ TRANS+	***	***	0.315858
	hpr1Δrad51Δ	76.1	76.1	69.6	44.9	45.07	47.88	43.36	74.4	89.5	44.64	58.26	61.7	3322	2277	2362	1121	3553	2015		hpr1Δrad51Δ	57.5729	5.86361	65.7	7.60594	2653.67	335.066	2229.67	710.215		hpr1Δ	CIS- TRANS-	**					0.852249	0.0361377	0.0353608
																																CIS- TRANS+					0.852249			0.0354963
																												P-value	<=			CIS+ TRANS-					*			0.547491
																												0.0001	****			CIS+ TRANS+					*	*	0.547491
																												0.001	***		rad51Δ	CIS- TRANS-	*									0.133399	0.000566003	0.000734762
																												0.01	**			CIS- TRANS+									0.133399			0.000963763
																												0.05	*			CIS+ TRANS-									***			0.868064
																																CIS+ TRANS+									***	***	0.868064
																															hpr1Δrad51Δ	CIS- TRANS-	***													0.409612	1.1965e-06	0.000911231
																																CIS- TRANS+													0.409612			0.00586961
																																CIS+ TRANS-													****			0.617901
																																CIS+ TRANS+													***	**	0.617901
