# Supplementary material for: Harmful DNA:RNA hybrids are formed in cis and in a Rad51-independent manner
Source: eLife journal article supplement (doi:10.7554/elife.56674), 2020-08-04
Supplement: supp [file elife-56674-supp-v1.zip › elife_poa_e56674_Figure_7_source_data_1.xlsx]

## Sheet: Fig7A
Figure 7. Panel A
															Statistics												WT				hpr1Δ				rad51Δ				hpr1Δrad51Δ
	Data (GFP+ cells (%))															OFF		OFF + RNH		ON		ON + RNH					Empty	RNH1	AID	RNH1+AID	Empty	RNH1	AID	RNH1+AID	Empty	RNH1	AID	RNH1+AID	Empty	RNH1	AID	RNH1+AID
		Empty			RNH1			AID			RNH1+AID					Average	SEM	Average	SEM	Average	SEM	Average	SEM		WT	Empty		0.0504504	0.0352196	0.01939	0.00105811				0.00691639				0.0036731
	WT	3.14465	3.35195	3.01205	2.40964	2.267	2.94118	2.91262	2.5974	2.73556	1.67598	2.32558	2.48447		WT	3.16955	0.0989093	2.53927	0.205127	2.74853	0.0912263	2.16201	0.247307			RNH1	0.0504504
	hpr1Δ	6.94444	7.1875	5.88235	3.85852	3.54839	3.10559	8.64198	10.9091	8.86567	5.28053	6.17284	4.01235		hpr1Δ	6.67143	0.40073	3.50417	0.218474	9.47225	0.721319	5.15524	0.626819			AID	*			0.0901036
	rad51Δ	11.6147	17.1974	20.4986	20.3704	17.8571	15.5807	20.7951	20.8333	22.0859	18.0645	22.0065	19.9422		rad51Δ	16.4369	2.5926	17.9361	1.38321	21.2381	0.424034	20.0044	1.13837			RNH1+AID	*		0.0901036
	hpr1Δrad51Δ	13.0573	20.9524	19.1045	6.97674	14.791	9.52381	18.8571	17.4648	16.0237	12.5412	10.7492	11.2149		hpr1Δrad51Δ	17.7047	2.38415	10.4305	2.30089	17.4486	0.817972	11.5018	0.536837		hpr1Δ	Empty	**					0.00226466	0.0274216	0.111198
																										RNH1					**
																						P-value	<=			AID					*			0.0106786
																						0.0001	****			RNH1+AID					0.111198		*
																						0.001	***		rad51Δ	Empty	**									0.636792	0.141622	0.276196
																						0.01	**			RNH1									0.636792
																						0.05	*			AID									0.141622			0.367261
																										RNH1+AID									0.276196		0.367261
																									hpr1Δrad51Δ	Empty	**													0.0931262	0.92394	0.064104
																										RNH1													0.0931262
																										AID													0.92394			0.00370277
																										RNH1+AID													0.064104		**

## Sheet: Fig7B
Figure 7. Panel B
								Statistics
	Data (nuclei with S9.6 signal (%))
									Average	SEM	P-value
	WT	15.38	25.2174	24.0838	7.0922	15.0794		WT	17.3705	3.32789	1
	rad51Δ	13.9535	19.4444	33	30.0971			rad51Δ	24.1238	4.47026	0.254886	0.254886
	hpr1Δ	49	56	26.7857				hpr1Δ	43.9286	8.8064	0.0145135	*
	hpr1Δrad51Δ	35.29	42.8571	35.5769				hpr1Δrad51Δ	37.908	2.47595	0.00516996	**
	rnh1Δrnh201Δ	59.6591	64	56				rnh1Δrnh201Δ	59.8864	2.3122	0.000108275	***
